# Supplementary material for: Japanese Encephalitis: A Case of Miraculous Recovery After 68 Days of ICU Admission in a 30 -Years-Old-Male
Source: Research Square preprint supplement (doi:10.21203/rs.3.rs-7529089/v1), 2025-10-22
Supplement: Supplementary file [file 794b080443ecf781af5837b5.pdf]

# CARE Checklist of information to include when writing a case report

| Topic | Item | Checklist item description                                                                   | Reported on Line |
|-------|------|----------------------------------------------------------------------------------------------|------------------|
| Title | 1    | The diagnosis or intervention of primary focus followed by the words “case report” . . . . . | page 1           |

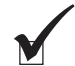

|                                 |                            |                                                                                                                               |             |
|---------------------------------|----------------------------|-------------------------------------------------------------------------------------------------------------------------------|-------------|
| <b>Key Words</b>                | <b>2</b>                   | 2 to 5 key words that identify diagnoses or interventions in this case report, including "case report" .page 1                | <hr/> <hr/> |
| <b>Abstract</b><br>.....        | <b>3a</b>                  | Introduction: What is unique about this case and what does it add to the scientific literature? . . .page 1                   | <hr/> <hr/> |
| <b>(no references)</b><br>..... | <b>3b</b>                  | Main symptoms and/or important clinical findings . . . . <b>page 1</b> . . . . .                                              | <hr/> <hr/> |
| .....                           | <b>3c</b>                  | The main diagnoses, therapeutic interventions, and outcomes . . . . . <b>page 1</b> . . . . .                                 | <hr/> <hr/> |
| .....                           | <b>3d</b>                  | Conclusion—What is the main “take-away” lesson(s) from this case? . . . . . <b>page 1</b> . . . . .                           | <hr/> <hr/> |
| <b>Clinical Findings</b>        | <b>Introduction</b>        | <b>4</b> One or two paragraphs summarizing why this case is unique (may include references) . . . . . <b>page 2</b> . . . . . | <hr/> <hr/> |
| <b>Timeline</b>                 | <b>Patient Information</b> | <b>5a</b> De-identified patient specific information. . . . .                                                                 | <hr/> <hr/> |
| <b>Diagnostic Assessment</b>    | <b>5b</b>                  | Primary concerns and symptoms of the patient. . . . . <b>page 3</b> . . . . .                                                 | <hr/> <hr/> |
|                                 | <b>5c</b>                  | Medical, family, and psycho-social history including relevant genetic information . . . . .                                   | <hr/> <hr/> |
| <b>Therapeutic Intervention</b> | <b>5d</b>                  | Relevant past interventions with outcomes . . . . . <b>page 3</b> . . . . .                                                   | <hr/> <hr/> |
|                                 | <b>6</b>                   | Describe significant physical examination (PE) and important clinical findings. . . . . <b>page 2 and 3</b> . . . . .         | <hr/> <hr/> |
| <b>Follow-up and Outcomes</b>   | <b>7</b>                   | Historical and current information from this episode of care organized as a timeline . . . . .                                | <hr/> <hr/> |
|                                 | <b>8a</b>                  | Diagnostic testing (such as PE, laboratory testing, imaging, surveys). . . . . <b>page 3</b> . . . . .                        | <hr/> <hr/> |
|                                 | <b>8b</b>                  | Diagnostic challenges (such as access to testing, financial, or cultural) . . . . . <b>page 2 and 3</b> . . . . .             | <hr/> <hr/> |
| <b>Discussion</b>               | <b>8c</b>                  | Diagnosis (including other diagnoses considered) . . . . . <b>page 3</b> . . . . .                                            | <hr/> <hr/> |
|                                 | <b>8d</b>                  | Prognosis (such as staging in oncology) where applicable . . . . . <b>page 2 and 3</b> . . . . .                              | <hr/> <hr/> |
| <b>Patient Perspective</b>      |                            |                                                                                                                               | <hr/> <hr/> |
| <b>Informed Consent</b>         | <b>9a</b>                  | Types of therapeutic intervention (such as pharmacologic, surgical, preventive, self-care) . . . . . <b>page 3</b>            | <hr/> <hr/> |
| .....                           | <b>9b</b>                  | Administration of therapeutic intervention (such as dosage, strength, duration) . . . . . <b>page 2 and 3</b> . . . . .       | <hr/> <hr/> |
| .....                           |                            |                                                                                                                               | <hr/> <hr/> |

☐ No ☐

|           |                                                                                                                     |                          |
|-----------|---------------------------------------------------------------------------------------------------------------------|--------------------------|
| .....     | <b>9c</b> Changes in therapeutic intervention (with rationale) . . . . .                                            | <b>page 3.</b> . . . . . |
| .....     | <b>10a</b> Clinician and patient-assessed outcomes (if available) . . . . .                                         | <b>page 3.</b> . . . . . |
| .....     | <b>10b</b> Important follow-up diagnostic and other test results . . . . .                                          | <b>page 3</b> . . . . .  |
|           | <b>10c</b> Intervention adherence and tolerability (How was this assessed?) . . .                                   | <b>page 3</b> . . . . .  |
|           | ..... <b>10d</b> Adverse and unanticipated events . . . . .                                                         | <b>page 3</b> . . . . .  |
|           | .....                                                                                                               |                          |
| .....     | <b>11a</b> A scientific discussion of the strengths AND limitations associated with this case report . . . . .      | <b>page 4</b> . . . . .  |
| .....     | <b>11b</b> Discussion of the relevant medical literature <b>with references.</b> . . . . .                          | <b>page 5</b> . . . . .  |
| .....     | <b>11c</b> The scientific rationale for any conclusions (including assessment of possible causes) . .               | <b>page 4</b> . . . . .  |
| .         | <b>11d</b> The primary “take-away” lessons of this case report (without references) in a one paragraph conclusion . | page4.                   |
| <b>12</b> | The patient should share their perspective in one to two paragraphs on the treatment(s) they received . . . . .     |                          |
| <b>13</b> | Did the patient give informed consent? Please provide if requested . . . . .                                        | <b>Yes</b>               |
